# Supplementary material for: On the Impact of Chemo-Mechanically Induced Phenotypic Transitions in Gliomas
Source: Cancers (Basel). 2019 May 24;11(5):716. doi: 10.3390/cancers11050716 (PMC6562768; doi:10.3390/cancers11050716)
Supplement: Supplementary file 1 [file cancers-11-00716-s001.pdf]

# On the Impact of Chemo-Mechanically Induced Phenotypic Transitions in Gliomas

Pietro Mascheroni, Juan Carlos Lopez Alfonso, Maria Kalli, Triantafyllos Stylianopoulos, Michael Meyer-Hermann and Haralampos Hatzikirou

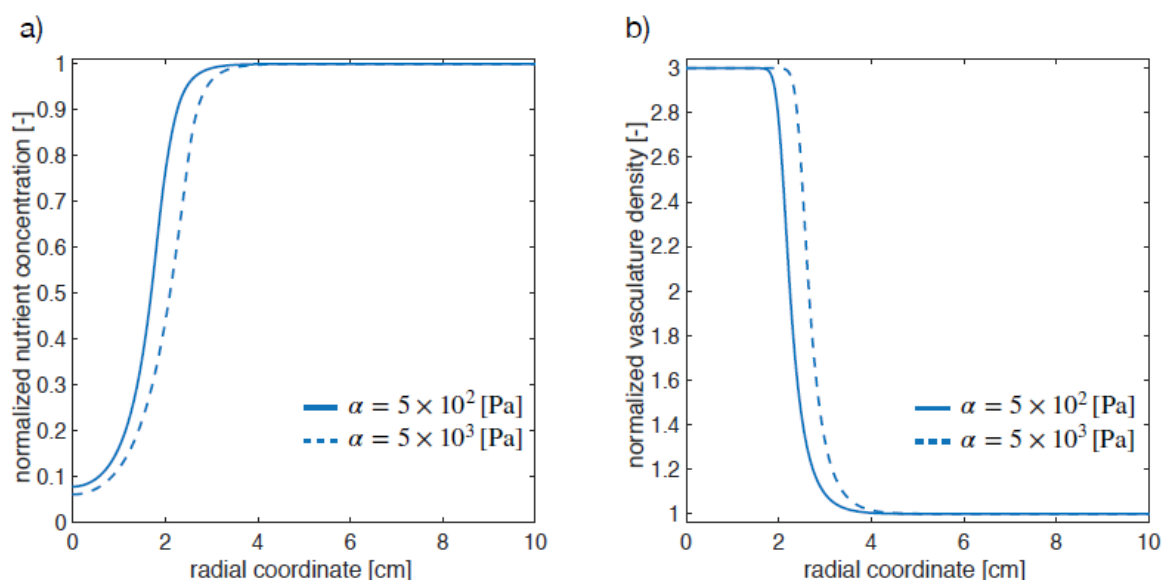

**Figure S1.** Changes in nutrient concentration (a) and vasculature density (b) after a stress-alleviation treatment ( $\alpha$  is reduced from  $5 \times 10^3$  Pa to  $5 \times 10^2$  Pa). The simulations refer to the case of  $D = 2.73 \times 10^{-1} \text{ mm}^2\text{d}^{-1}$  and  $r = 2.73 \times 10^{-2} \text{ d}^{-1}$ .

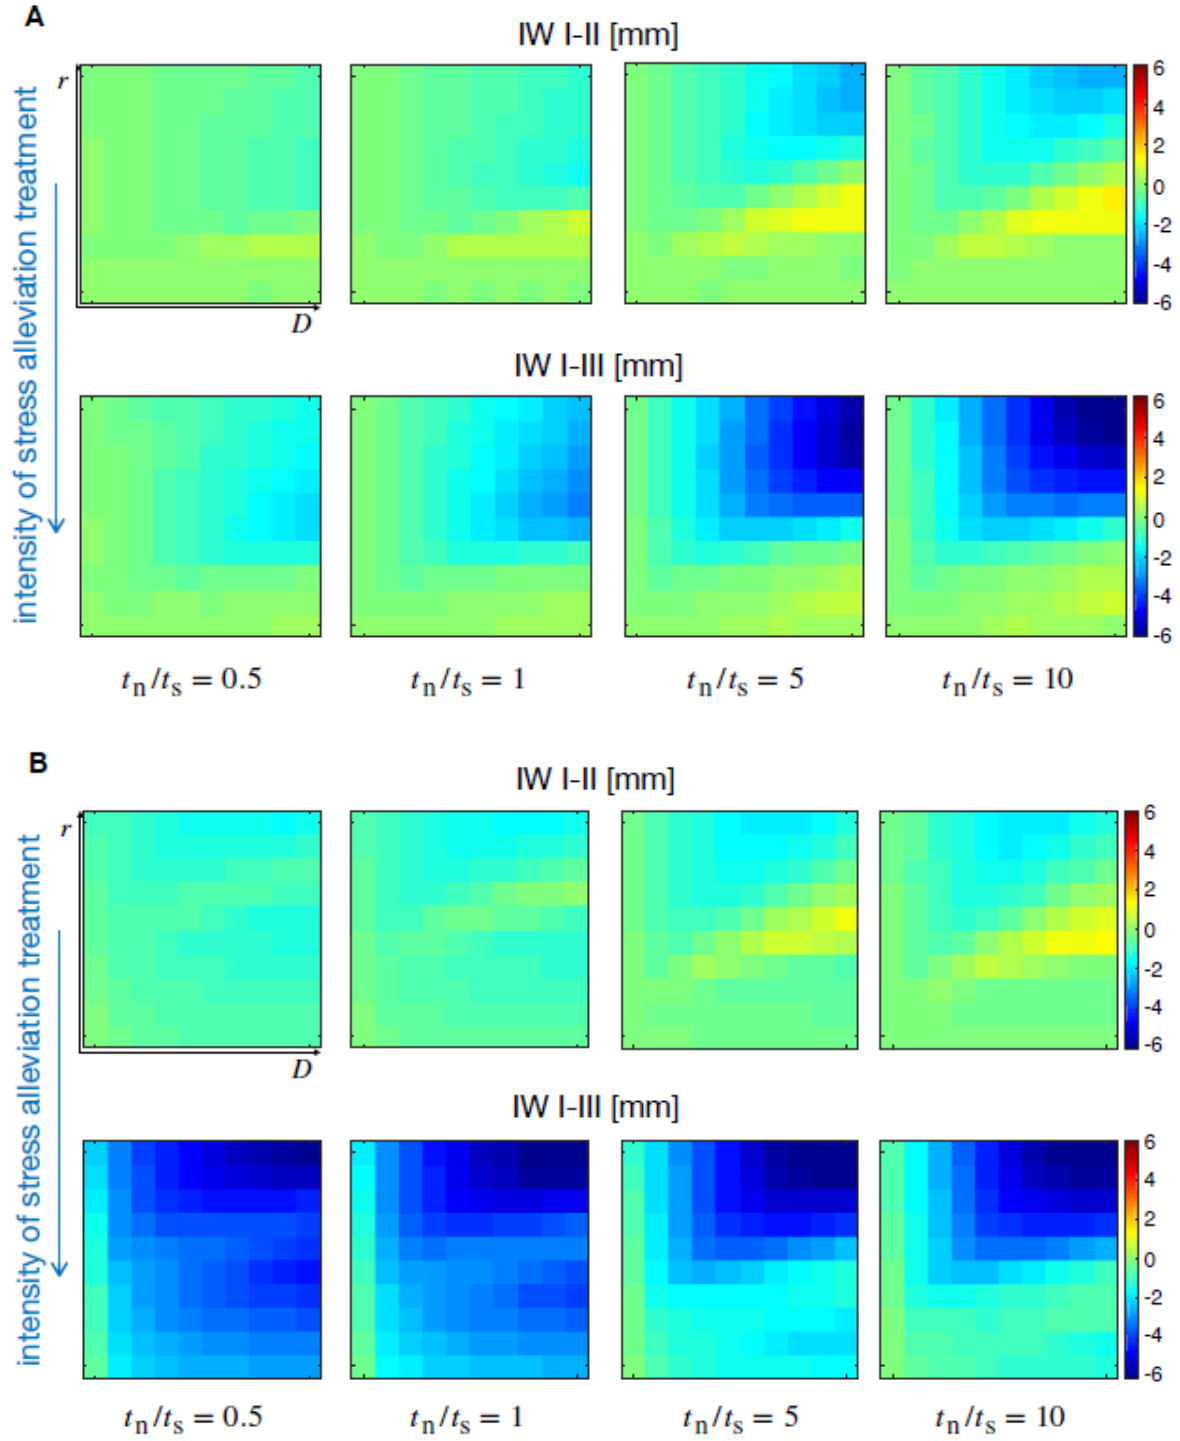

**Figure S2.** Simulation maps displaying the impact of chemo-mechanically induced transitions on tumor IW. In both cases (**A,B**), the top row shows the IW difference when tissue stiffness varies from  $\alpha = 10^3$  Pa to  $\alpha = 5 \times 10^2$  Pa, whereas the bottom row displays the IW variations for  $\alpha = 5 \times 10^3$  Pa to  $\alpha = 5 \times 10^2$  Pa. Simulations were obtained for low, i.e.,  $\alpha\sigma^{-1} = [10^{-2}, 10^{-1}]$  (**A**), and high, i.e.,  $\alpha\sigma^{-1} = [10^1, 10^2]$  (**B**) mechanosensitivity.

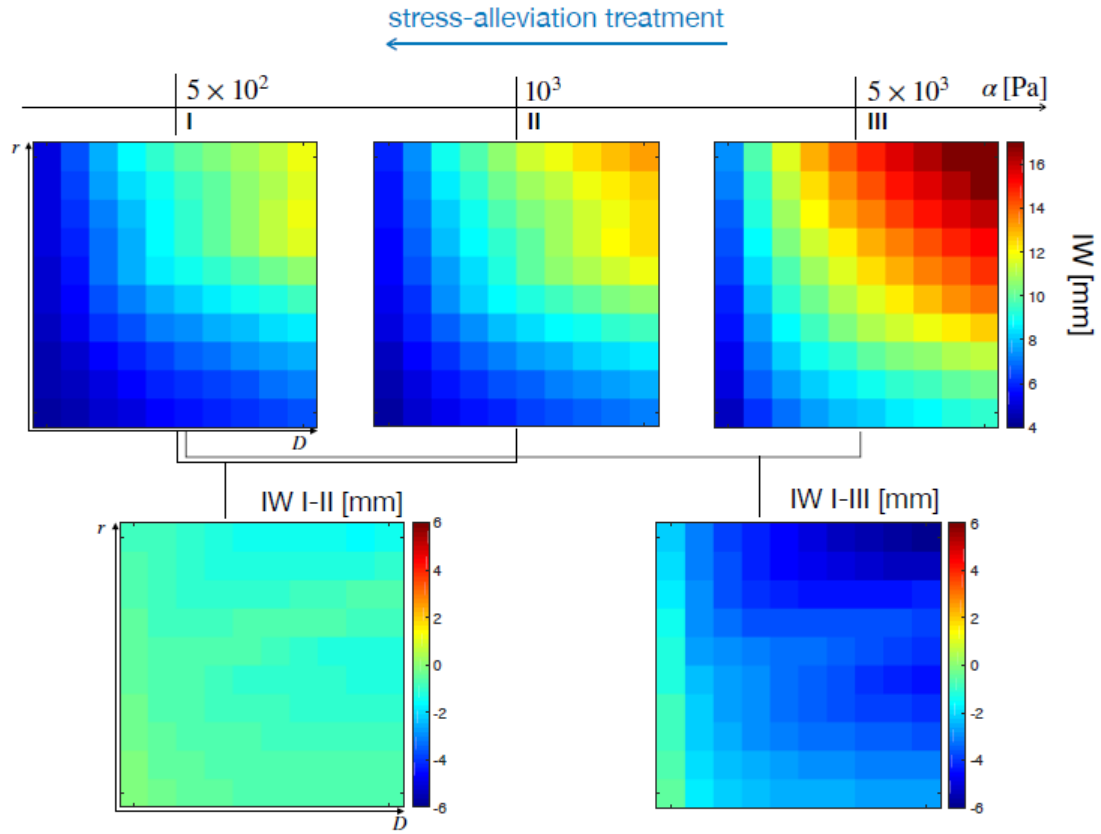

**Figure S3.** Simulation maps displaying the effects of chemo-mechanically induced transitions on tumor IW. The top row shows three IW maps for different values of  $\alpha$ , whereas the bottom row displays the IW variation occurring at the different stiffness points. For these simulations, we used  $t_n/t_s = 0.5$  and  $\alpha\sigma^{-1} = [10^1, 10^2]$ .

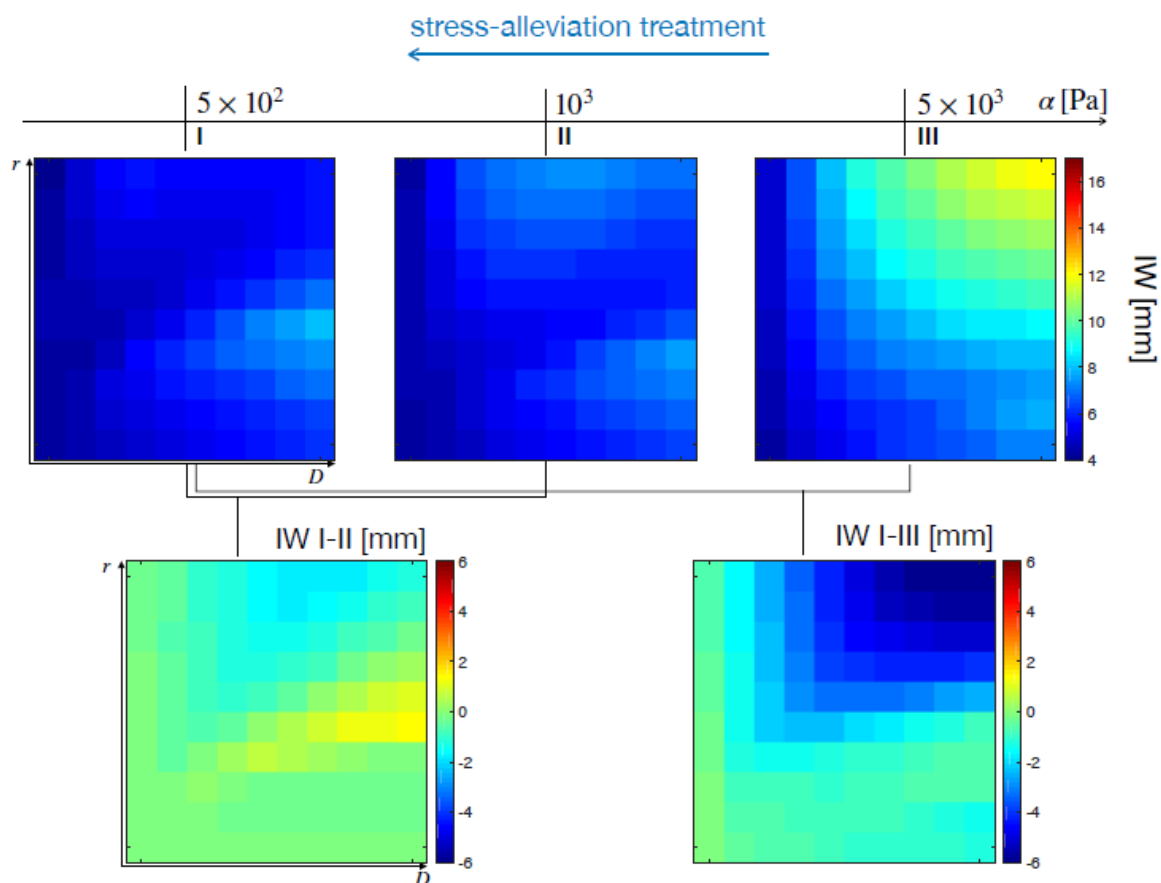

**Figure S4.** Simulation maps displaying the effects of chemo-mechanically induced transitions on tumor IW. The top row shows three IW maps for different values of  $\alpha$ , whereas the bottom row displays the IW variation occurring at the different stiffness points. For these simulations, we used  $t_n/t_s = 10$  and  $\alpha\sigma^{-1} = [10^1, 10^2]$ .

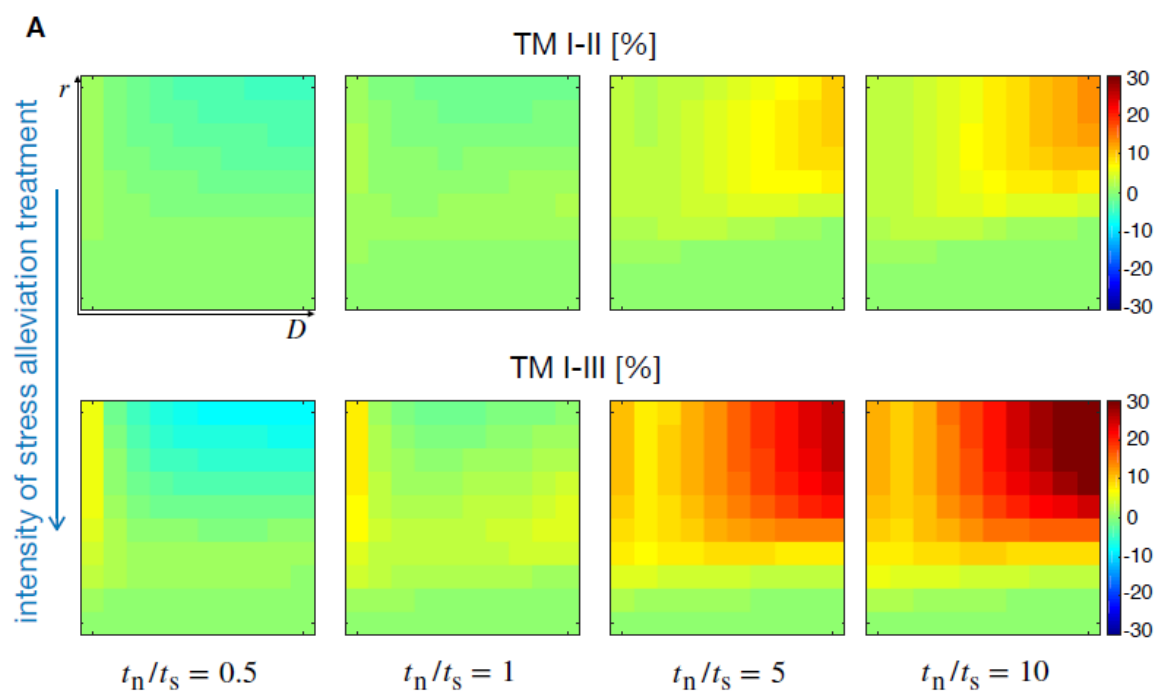

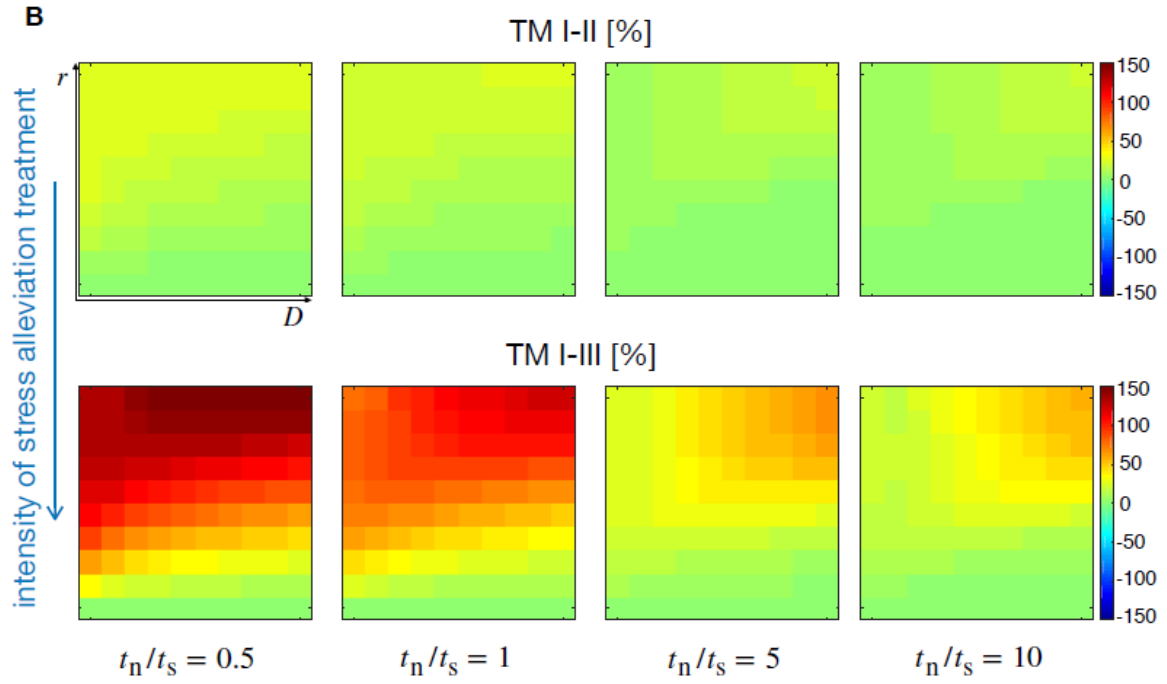

**Figure S5.** Simulation maps displaying the impact of chemo-mechanically induced transitions on TM. In both cases (A,B), the top row shows the TM difference for a reduction in tissue stiffness from  $\alpha = 10^3$  Pa to  $\alpha = 5 \times 10^2$  Pa, whereas the bottom row displays the TM variations for  $\alpha = 5 \times 10^3$  Pa to  $\alpha = 5 \times 10^2$  Pa. Simulations were obtained for low, i.e.,  $\alpha\sigma^{-1} = [10^{-2}, 10^{-1}]$  (A), and high, i.e.,  $\alpha\sigma^{-1} = [10^1, 10^2]$  (B) mechanosensitivity.

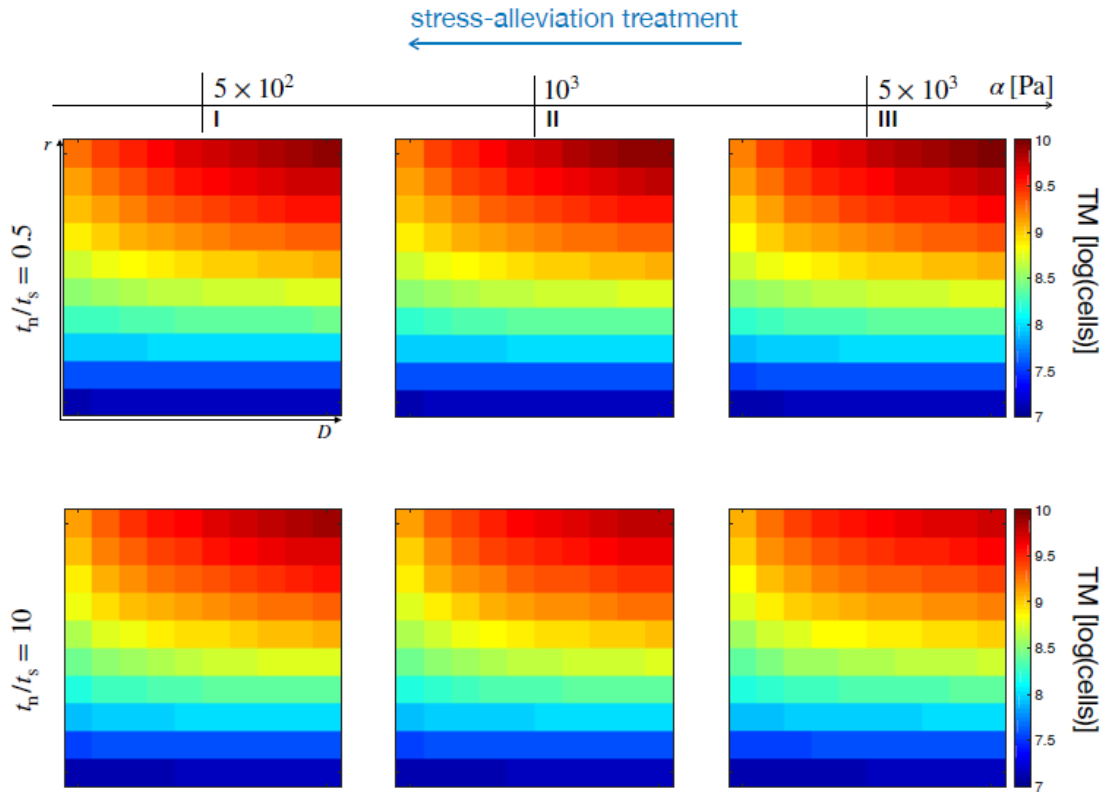

**Figure S6.** Simulation maps displaying the effects of chemo-mechanically induced transitions on TM. The top row shows three TM maps for different values of  $\alpha$  at the ratio  $t_n/t_s = 0.5$ , whereas the bottom row displays TM values over the  $(D, r)$  space for the different stiffnesses at the  $t_n/t_s = 10$  ratio. The simulations refer to the low mechanosensitivity case, i.e.,  $\alpha\sigma^{-1} = [10^{-2}, 10^{-1}]$ .

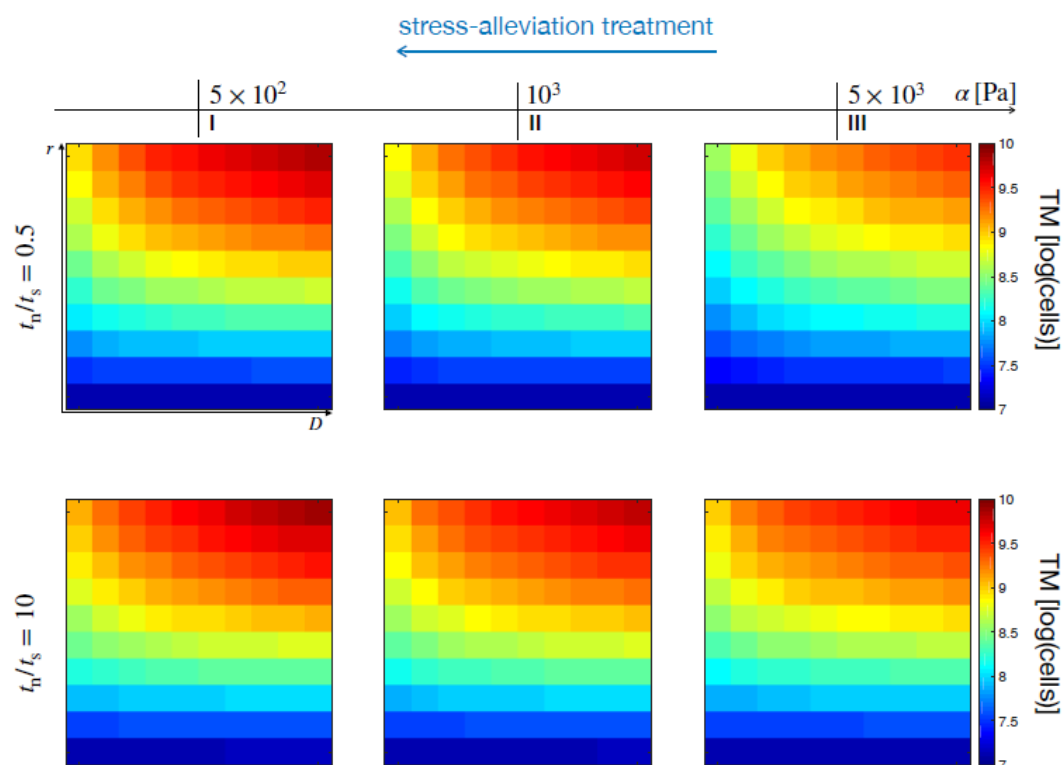

**Figure S7.** Simulation maps displaying the effects of chemo-mechanically induced transitions on TM. The top row shows three TM maps for different values of  $\alpha$  at the ratio  $t_n/t_s = 0.5$ , whereas the bottom row displays TM values over the  $(D, r)$  space for the different stiffnesses at the  $t_n/t_s = 10$  ratio. The simulations refer to the high mechanosensitivity case, i.e.,  $\alpha\sigma^{-1} = [10^1, 10^2]$ .

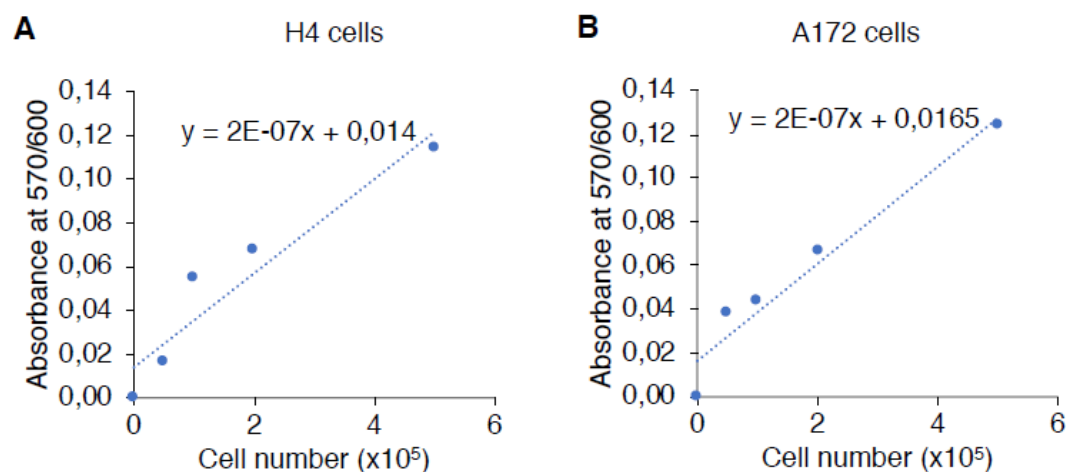

**Figure S8.** Calibration curves for the H4 (A) and A172 (B) cell lines for the Alamar Blue assay.

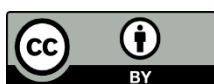

© 2019 by the authors. Licensee MDPI, Basel, Switzerland. This article is an open access article distributed under the terms and conditions of the Creative Commons Attribution (CC BY) license (<http://creativecommons.org/licenses/by/4.0/>).
